# Supplementary material for: Amide Derivatives of Ginkgolide B and Their Inhibitory Effects on PAF-Induced Platelet Aggregation
Source: PubMed Central journal article supplement — ACS Omega. 2021 Aug 24;6(35):22497–503. doi: 10.1021/acsomega.1c01682 (PMC8427636; doi:10.1021/acsomega.1c01682), 2021-08-24
Supplement: ao1c01682_si_001.pdf [file ao1c01682_si_001.pdf]

## Supporting information

### **Amide derivatives of ginkgolide B and their inhibitory effects on PAF-induced platelet aggregation**

Qiang Shang<sup>a,b</sup>, Xiaobo Zhou<sup>a</sup>, Ming-Rong Yang<sup>a</sup>, Jing-Guang Lu<sup>a</sup>, Yu Pan<sup>a</sup>, Guo-Yuan Zhu<sup>a,\*</sup>, Zhi-Hong Jiang<sup>a,\*</sup>

*<sup>a</sup> State Key Laboratory of Quality Research in Chinese Medicine, Guangdong-Hong Kong-Macao Joint Laboratory of Respiratory Infectious Disease, Macau Institute for Applied Research in Medicine and Health, Macau University of Science and Technology, Macau, People's Republic of China*

*<sup>b</sup> Livzon Pharmaceutical Group Inc., Zhuhai, 519000, People's Republic of China*

Corresponding authors:

E-mail address: zhjiang@must.edu.mo. (Z. -H. Jiang)

gyzhu@must.edu.mo. (G. -Y. Zhu)

**List:**

|                   |                                                                                                           |     |
|-------------------|-----------------------------------------------------------------------------------------------------------|-----|
| <b>Figure S1</b>  | Total ion chromatography (TIC) spectrum of the reaction of GB ( <b>1</b> ) with propylamine at 50 °C..... | S4  |
| <b>Figure S2</b>  | <sup>1</sup> H NMR spectrum of <b>2</b> .....                                                             | S4  |
| <b>Figure S3</b>  | <sup>13</sup> C NMR spectrum of <b>2</b> .....                                                            | S5  |
| <b>Figure S4</b>  | HSQC spectrum of <b>2</b> .....                                                                           | S5  |
| <b>Figure S5</b>  | HMBC spectrum of <b>2</b> .....                                                                           | S6  |
| <b>Figure S6</b>  | <sup>1</sup> H- <sup>1</sup> H COSY spectrum of <b>2</b> .....                                            | S6  |
| <b>Figure S7</b>  | NOESY spectrum of <b>2</b> .....                                                                          | S7  |
| <b>Figure S8</b>  | HR-ESI/TOF-MS spectrum of <b>2</b> .....                                                                  | S7  |
| <b>Figure S9</b>  | IR spectrum of <b>2</b> .....                                                                             | S8  |
| <b>Figure S10</b> | <sup>1</sup> H NMR spectrum of <b>3</b> .....                                                             | S8  |
| <b>Figure S11</b> | <sup>13</sup> C NMR spectrum of <b>3</b> .....                                                            | S9  |
| <b>Figure S12</b> | HSQC spectrum of <b>3</b> .....                                                                           | S9  |
| <b>Figure S13</b> | HMBC spectrum of <b>3</b> .....                                                                           | S10 |
| <b>Figure S14</b> | <sup>1</sup> H- <sup>1</sup> H COSY spectrum of <b>3</b> .....                                            | S10 |
| <b>Figure S15</b> | NOESY spectrum of <b>3</b> .....                                                                          | S11 |
| <b>Figure S16</b> | HR-ESI/TOF-MS spectrum of <b>3</b> .....                                                                  | S11 |
| <b>Figure S17</b> | IR spectrum of <b>3</b> .....                                                                             | S12 |
| <b>Figure S18</b> | <sup>1</sup> H NMR spectrum of <b>4</b> .....                                                             | S12 |
| <b>Figure S19</b> | <sup>13</sup> C NMR spectrum of <b>4</b> .....                                                            | S13 |
| <b>Figure S20</b> | HSQC spectrum of <b>4</b> .....                                                                           | S13 |
| <b>Figure S21</b> | HMBC spectrum of <b>4</b> .....                                                                           | S14 |
| <b>Figure S22</b> | <sup>1</sup> H- <sup>1</sup> H COSY spectrum of <b>4</b> .....                                            | S14 |
| <b>Figure S23</b> | NOESY spectrum of <b>4</b> .....                                                                          | S15 |
| <b>Figure S24</b> | HR-ESI/TOF-MS spectrum of <b>4</b> .....                                                                  | S15 |
| <b>Figure S25</b> | IR spectrum of <b>4</b> .....                                                                             | S16 |
| <b>Figure S26</b> | <sup>1</sup> H NMR spectrum of <b>5</b> .....                                                             | S16 |
| <b>Figure S27</b> | <sup>13</sup> C NMR spectrum of <b>5</b> .....                                                            | S17 |
| <b>Figure S28</b> | HSQC spectrum of <b>5</b> .....                                                                           | S17 |
| <b>Figure S29</b> | HMBC spectrum of <b>5</b> .....                                                                           | S18 |
| <b>Figure S30</b> | <sup>1</sup> H- <sup>1</sup> H COSY spectrum of <b>5</b> .....                                            | S18 |
| <b>Figure S31</b> | NOESY spectrum of <b>5</b> .....                                                                          | S19 |

|                   |                                                     |     |
|-------------------|-----------------------------------------------------|-----|
| <b>Figure S32</b> | HR-ESI/TOF-MS spectrum of <b>5</b> .....            | S19 |
| <b>Figure S33</b> | IR spectrum of <b>5</b> .....                       | S20 |
| <b>Figure S34</b> | <sup>1</sup> H NMR spectrum of <b>GB (1)</b> .....  | S20 |
| <b>Figure S35</b> | <sup>13</sup> C NMR spectrum of <b>GB (1)</b> ..... | S21 |
| <b>Figure S36</b> | HSQC spectrum of <b>GB (1)</b> .....                | S21 |
| <b>Figure S37</b> | HMBC spectrum of <b>GB (1)</b> .....                | S22 |

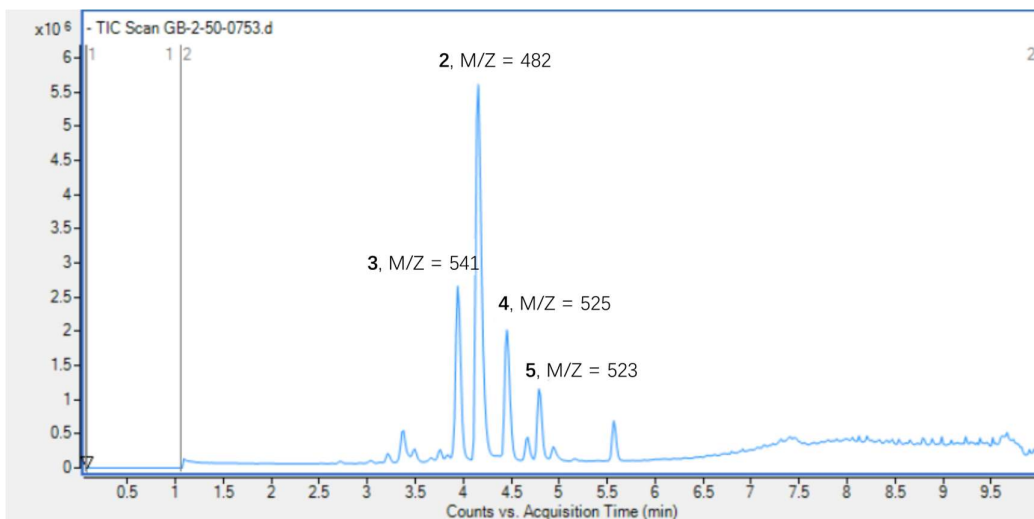

Figure S1 Total ion chromatography (TIC) spectrum of the reaction of GB (1) with propylamine at 50 °C

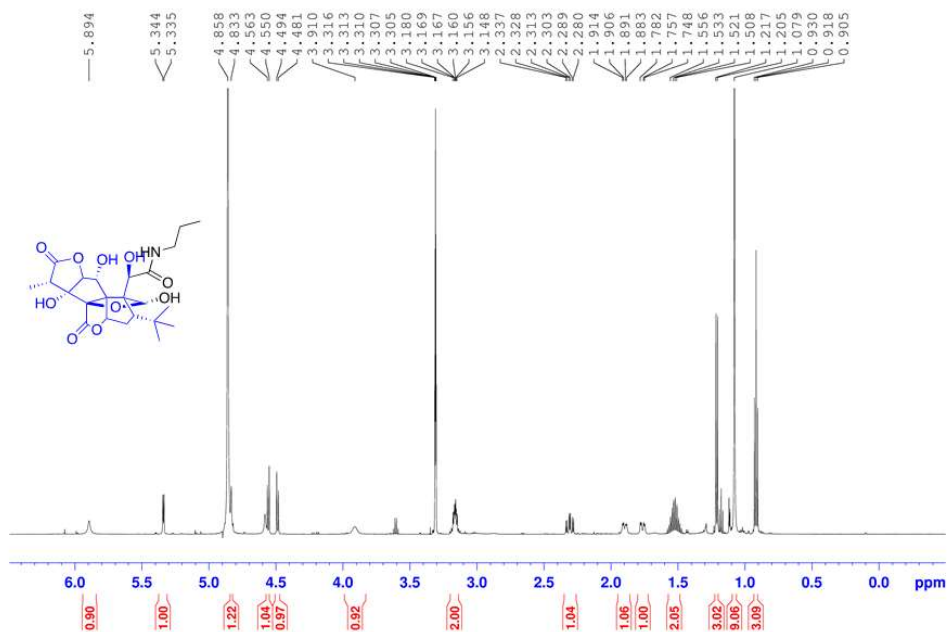

Figure S2 <sup>1</sup>H NMR spectrum of 2

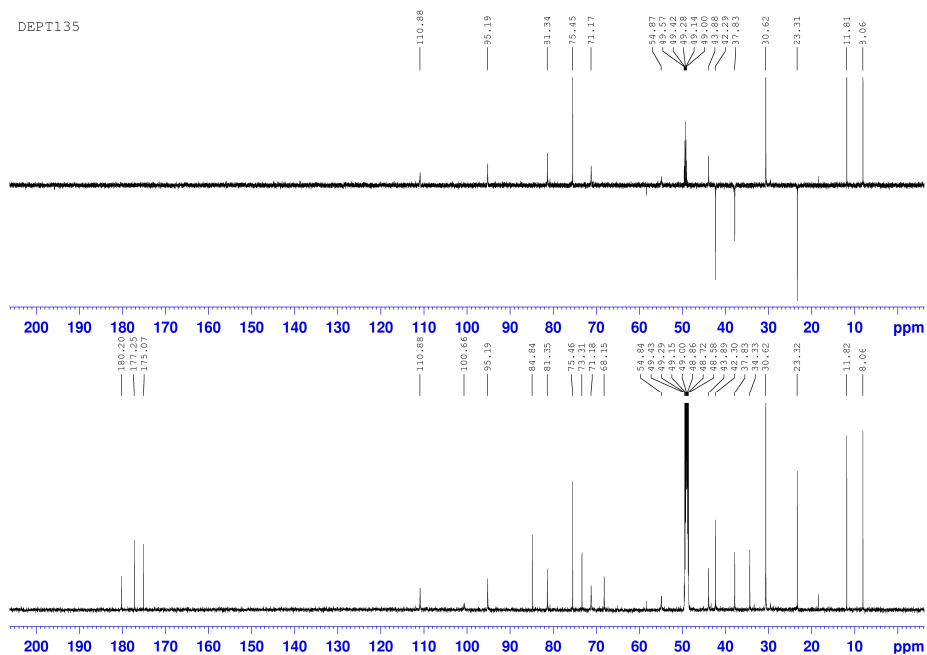

Figure S3  $^{13}\text{C}$  NMR spectrum of **2**

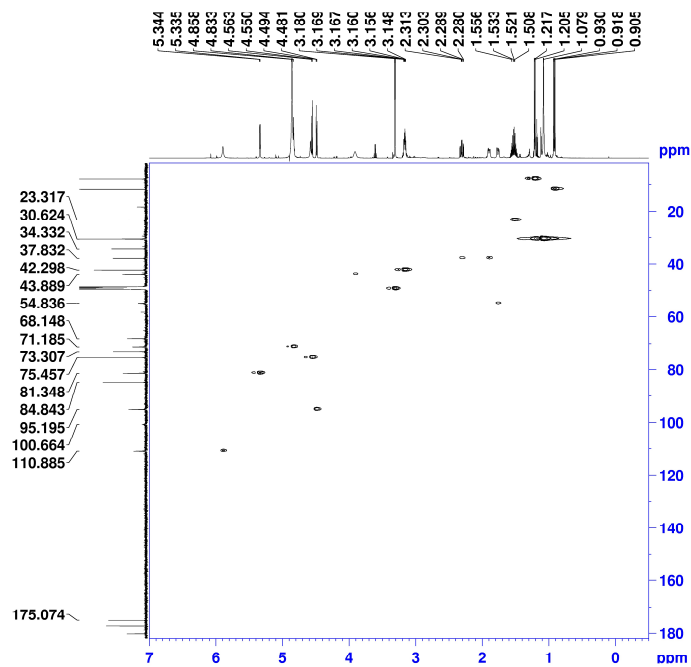

Figure S4 HSQC spectrum of **2**

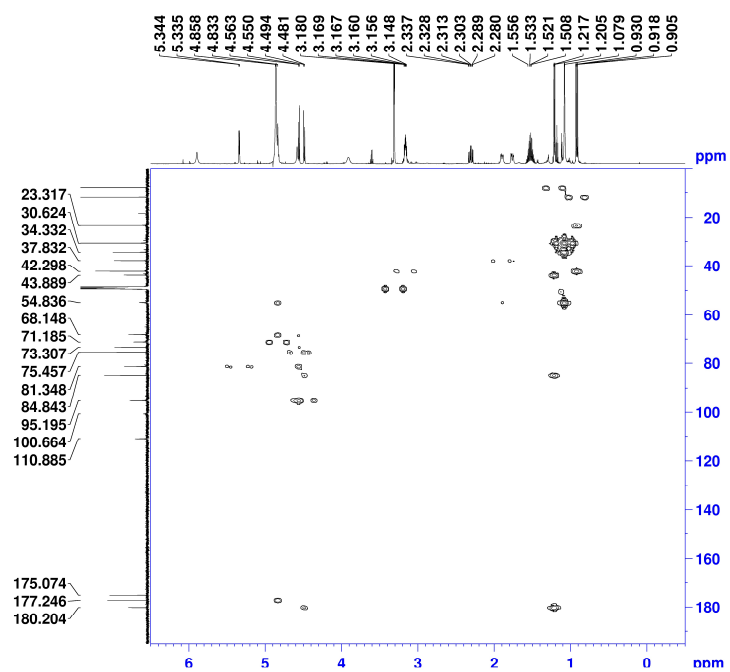

Figure S5 HMBC spectrum of **2**

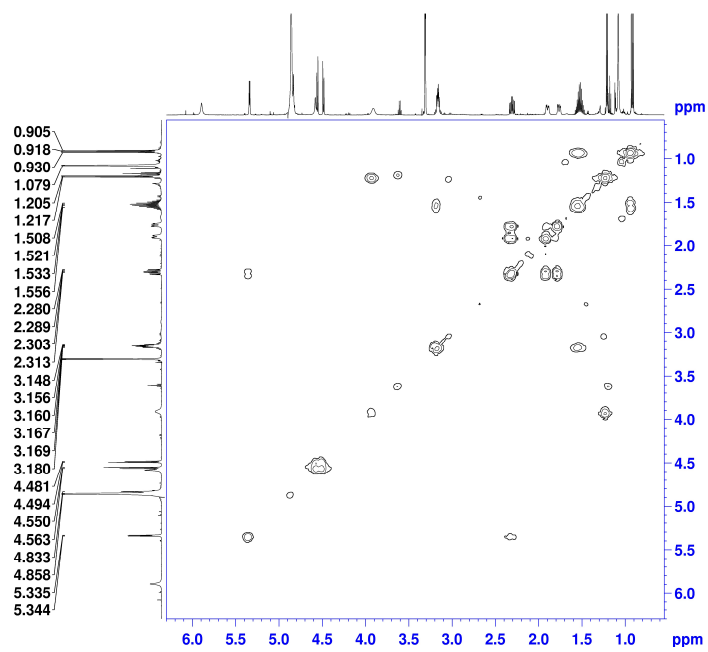

Figure S6  $^1\text{H}$ - $^1\text{H}$  COSY spectrum of **2**

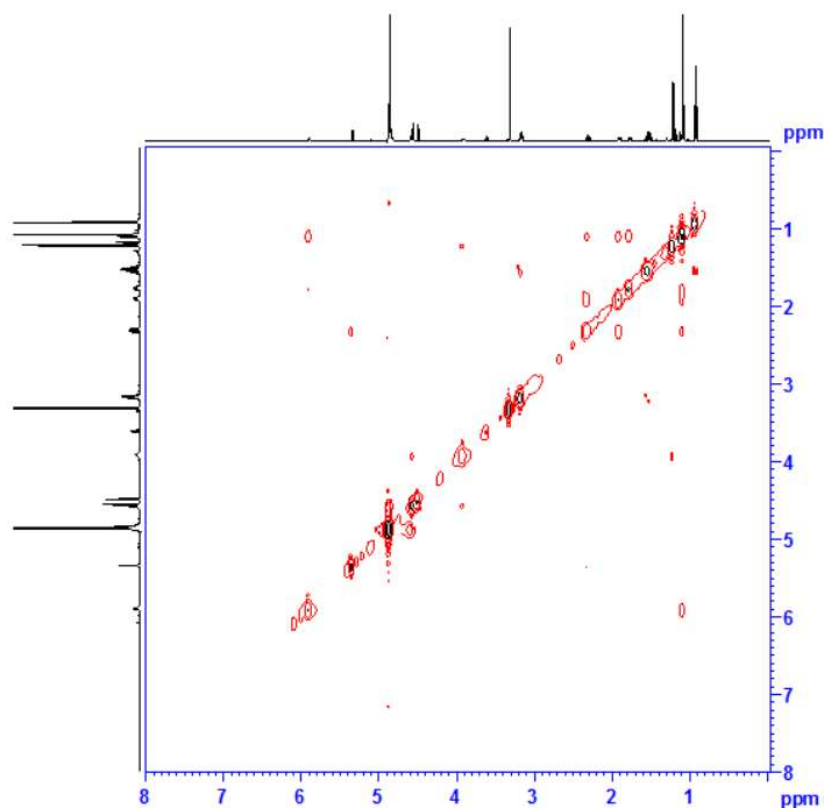

**Figure S7** NOESY spectrum of **2**

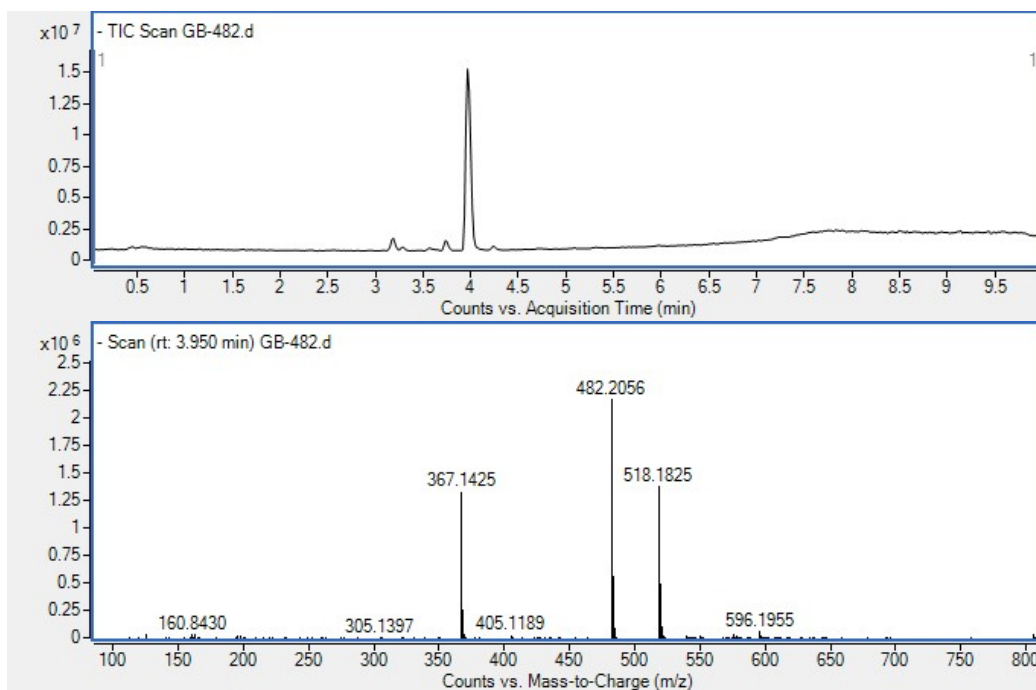

**Figure S8** HR-ESI/TOF-MS spectrum of **2**

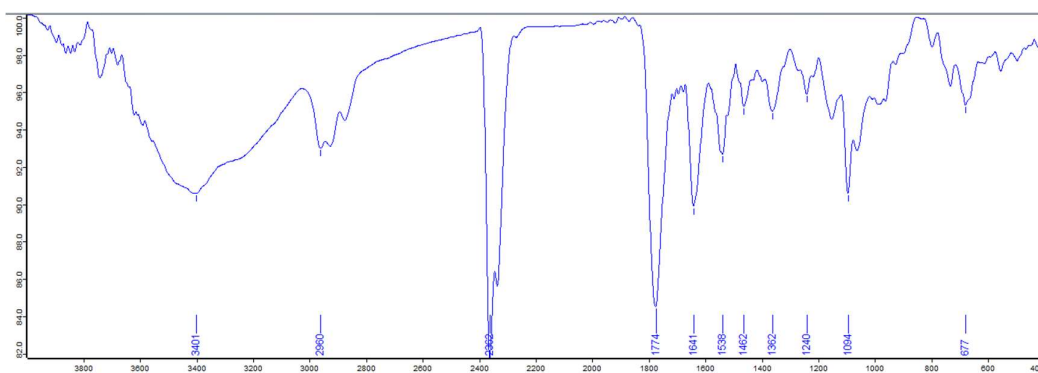

**Figure S9** IR spectrum of **2**

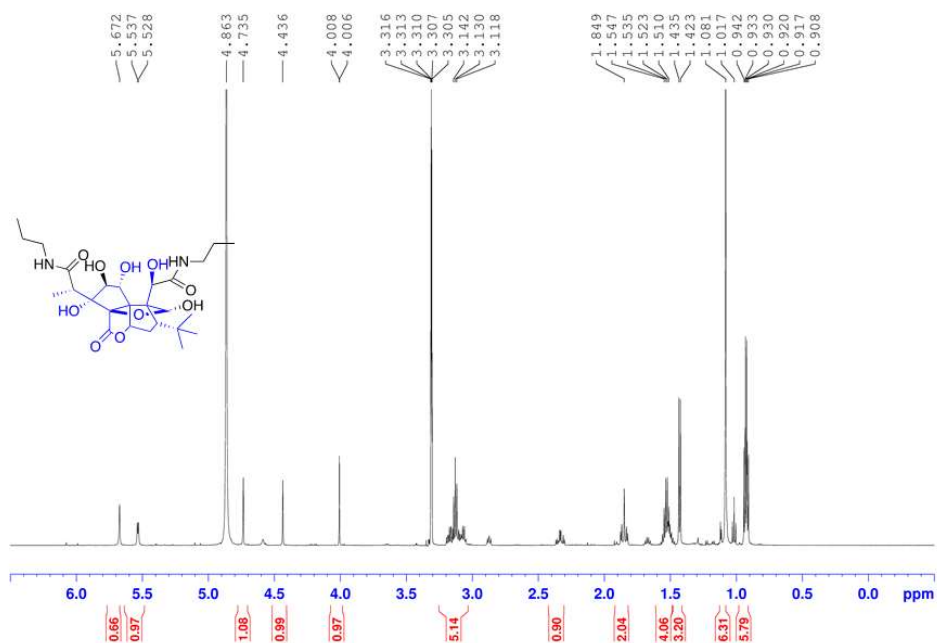

**Figure S10** <sup>1</sup>H NMR spectrum of **3**



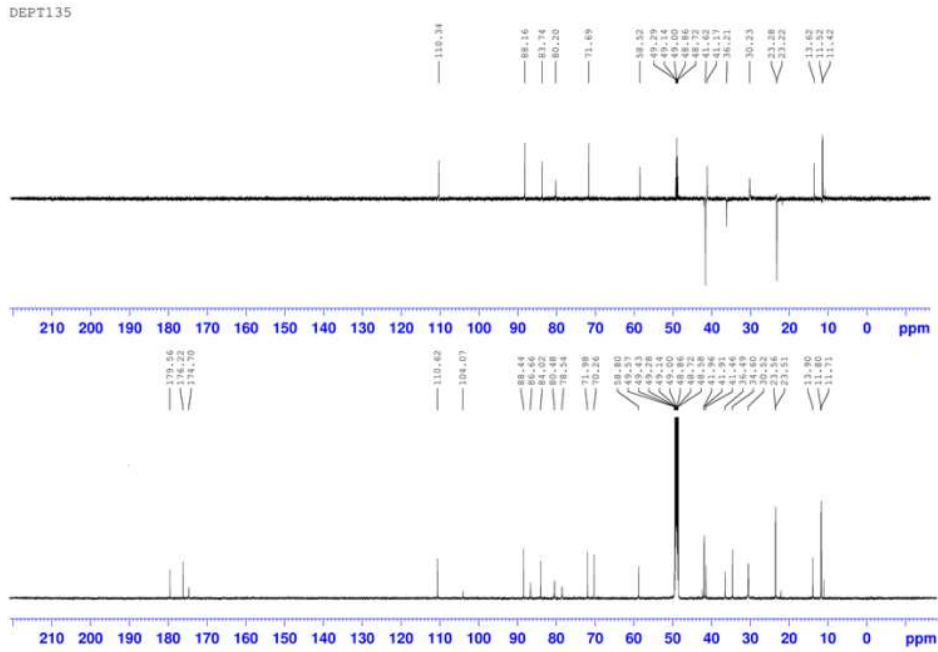

Figure S11  $^{13}\text{C}$  NMR spectrum of **3**

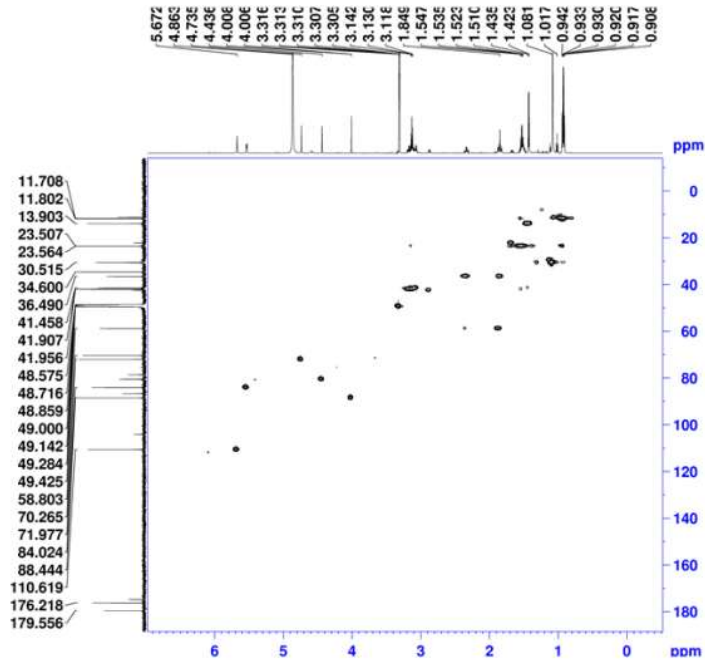

Figure S12 HSQC spectrum of **3**

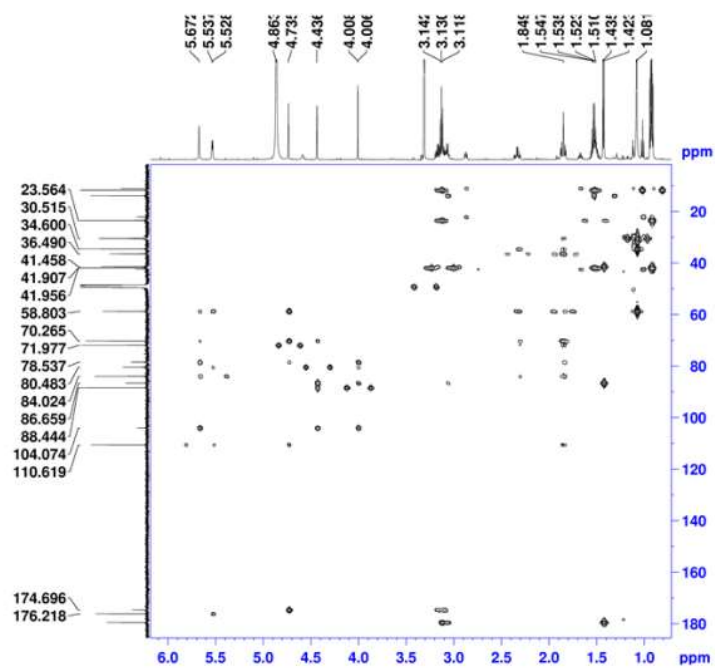

**Figure S13** HMBC spectrum of **3**

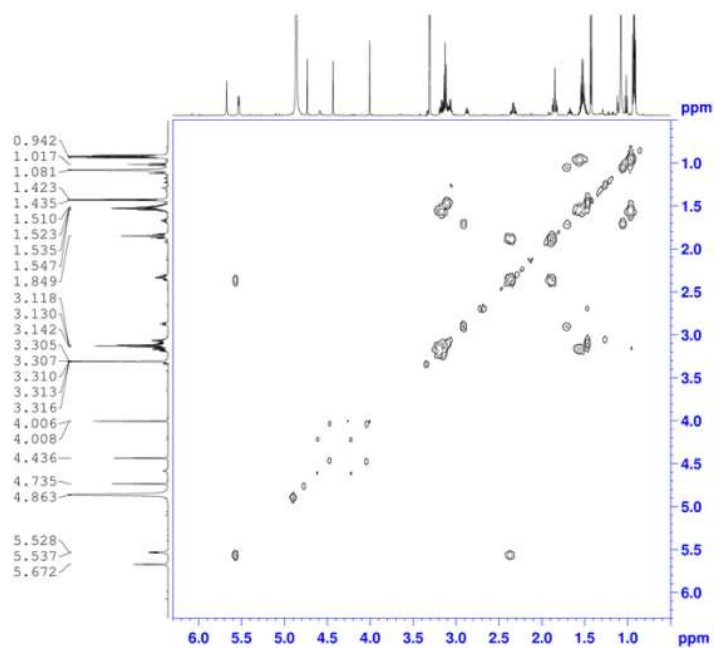

**Figure S14**  $^1\text{H}$ - $^1\text{H}$  COSY spectrum of **3**

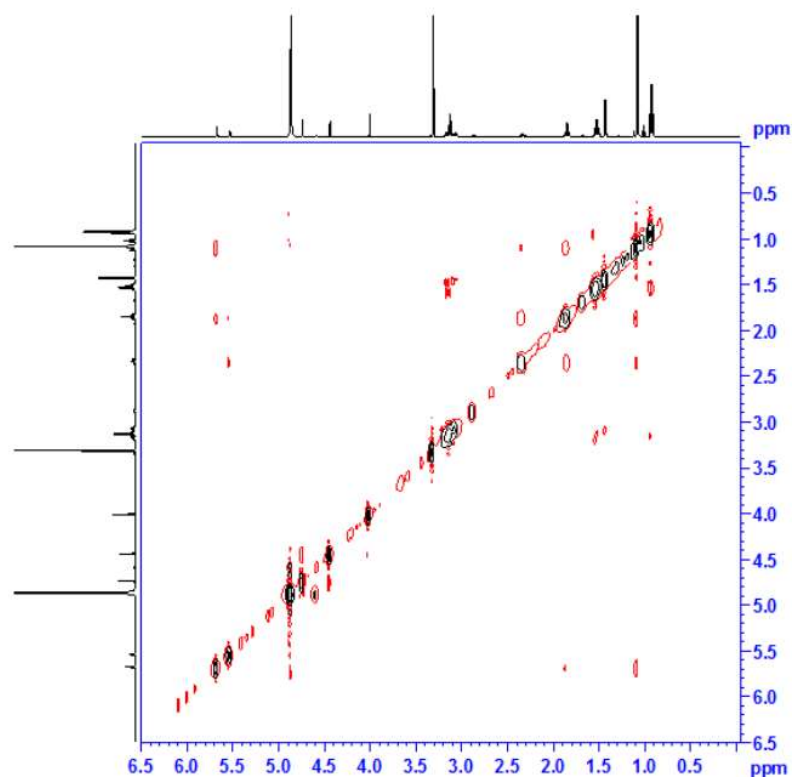

**Figure S15** NOESY spectrum of **3**

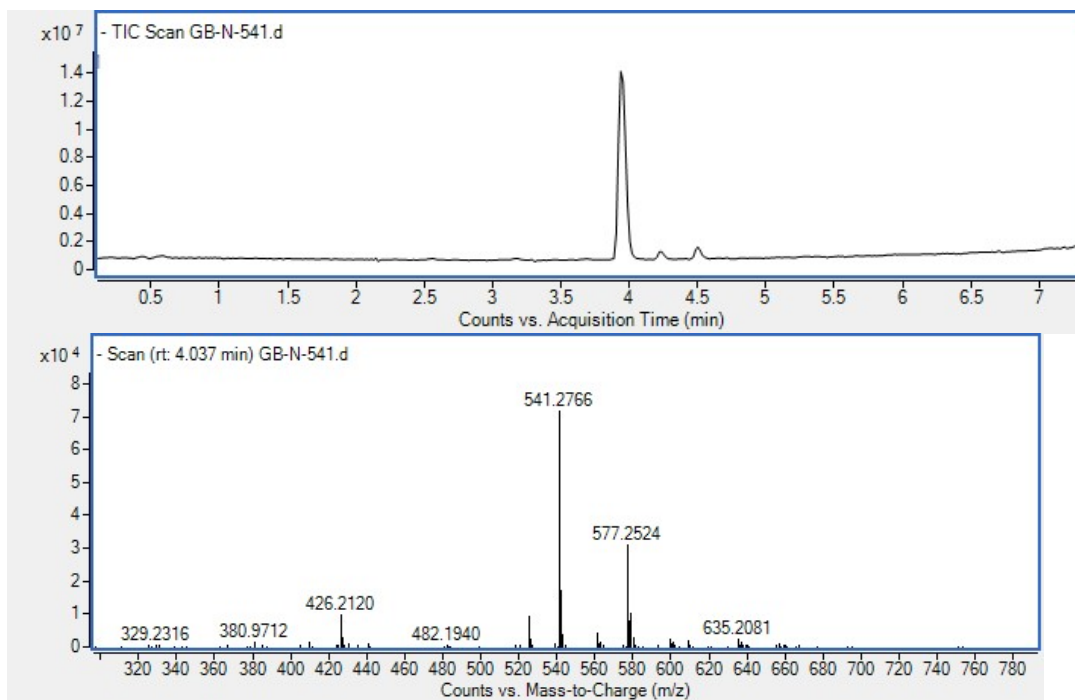

**Figure S16** HR-ESI/TOF-MS spectrum of **3**

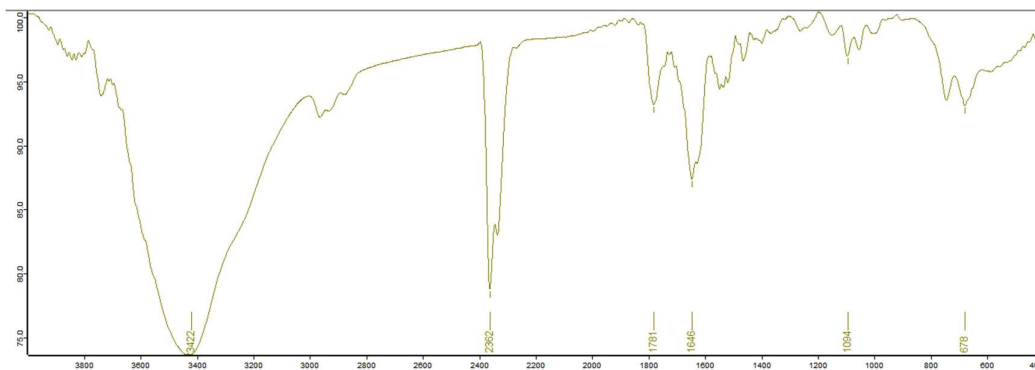

**Figure S17** IR spectrum of **3**

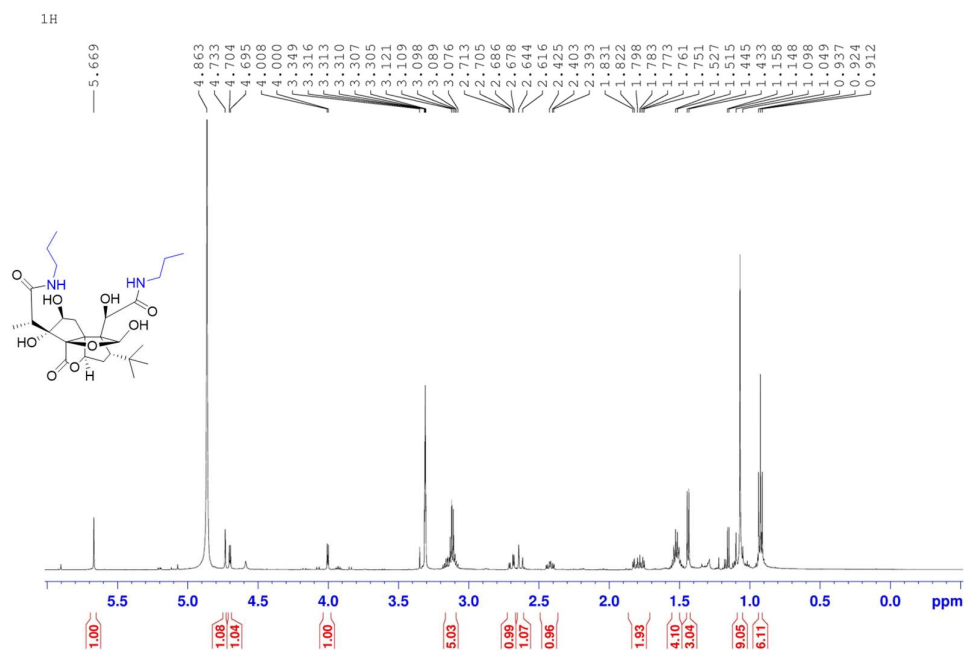

**Figure S18** <sup>1</sup>H NMR spectrum of **4**

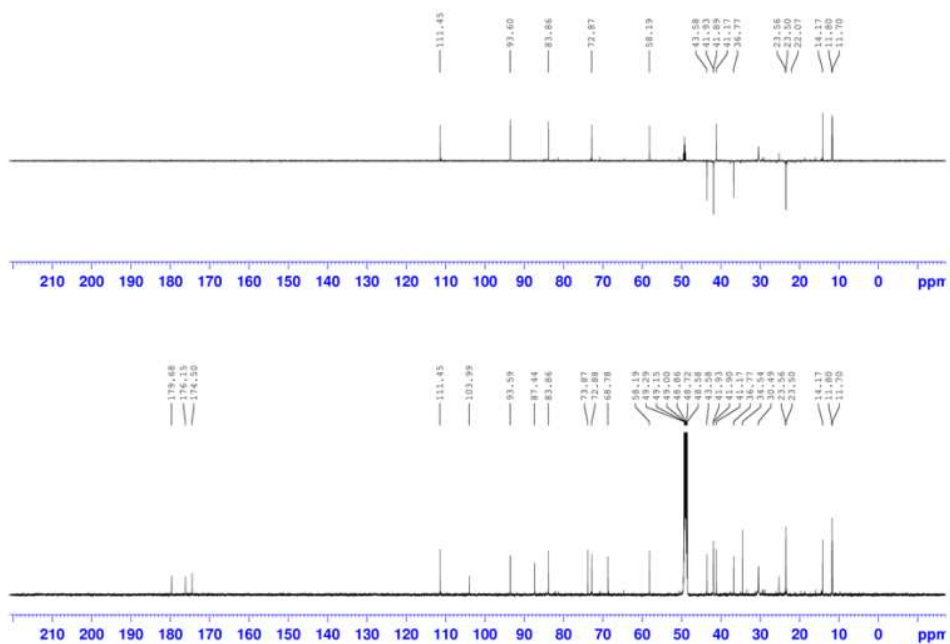

Figure S19  $^{13}\text{C}$  NMR spectrum of **4**

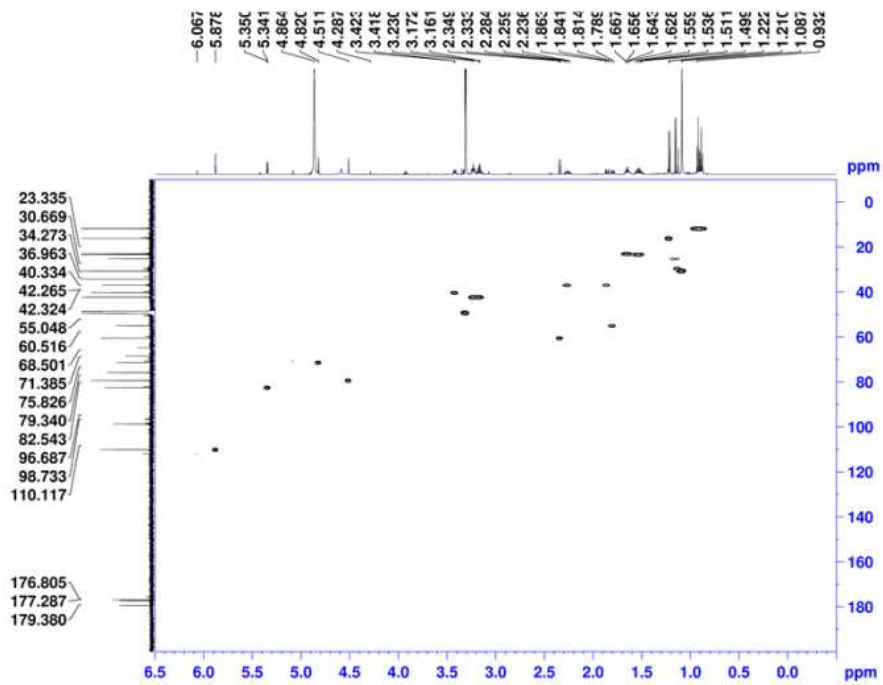

Figure S20 HSQC spectrum of **4**

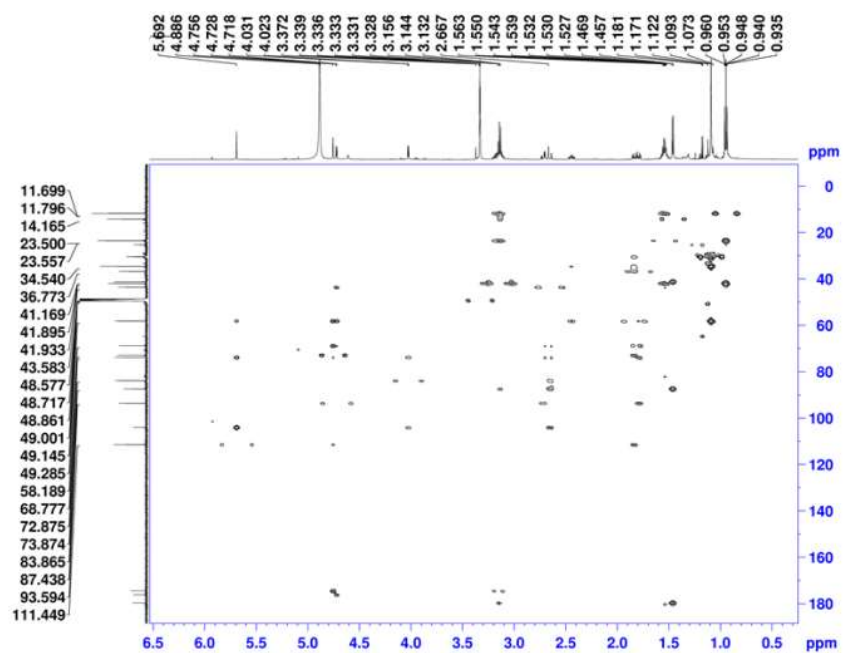

Figure S21 HMBC spectrum of 4

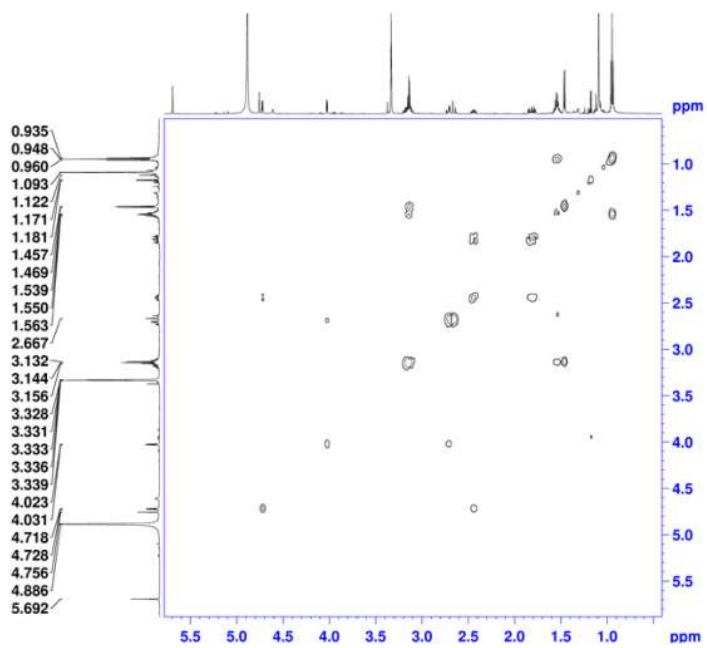

Figure S22  $^1\text{H}$ - $^1\text{H}$  COSY spectrum of 4

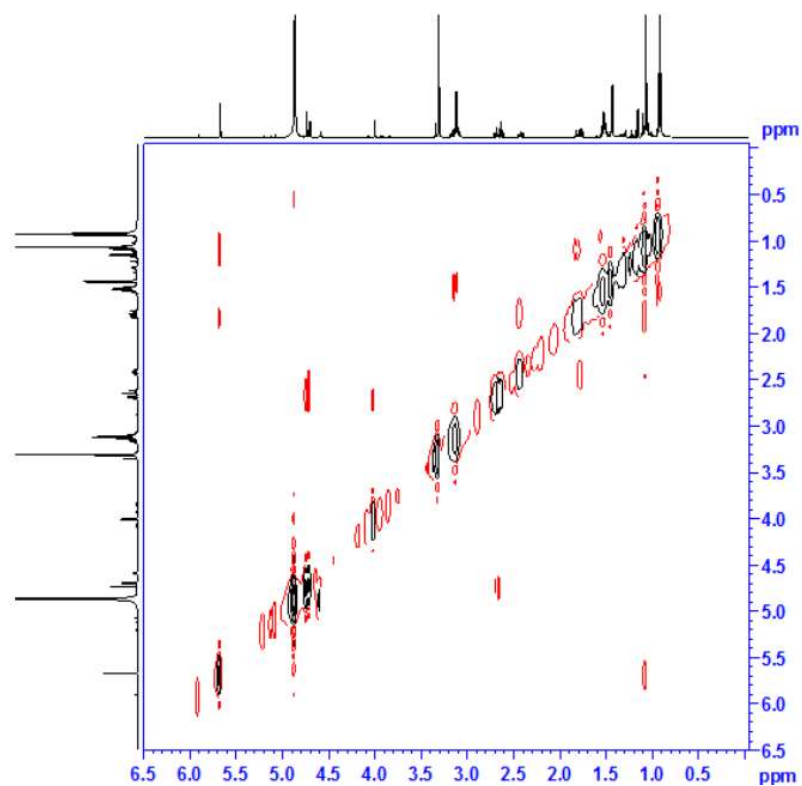

**Figure S23** NOESY spectrum of **4**

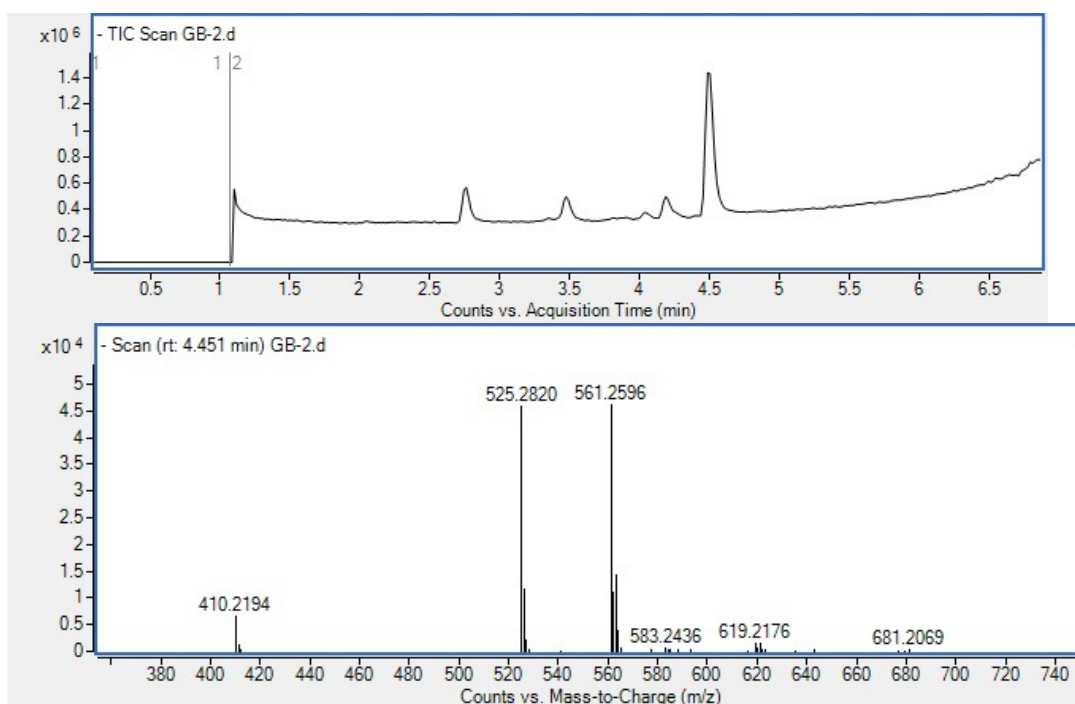

**Figure S24** HR-ESI/TOF-MS spectrum of **4**

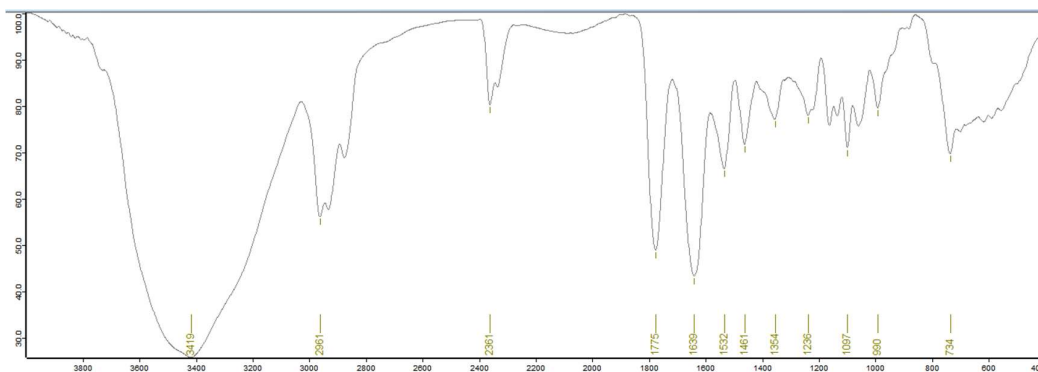

**Figure S25** IR spectrum of **4**

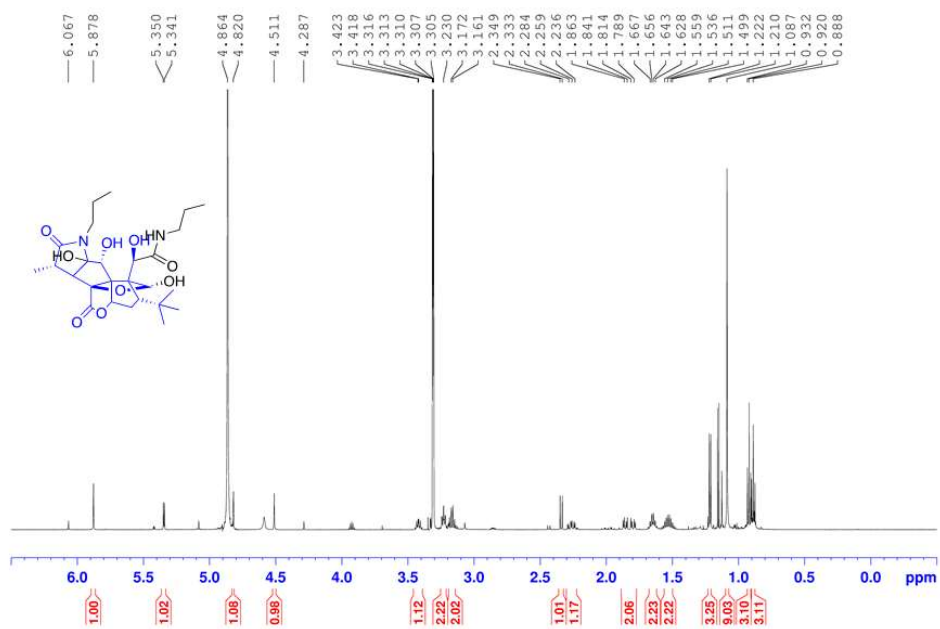

**Figure S26**  $^1\text{H}$  NMR spectrum of **5**



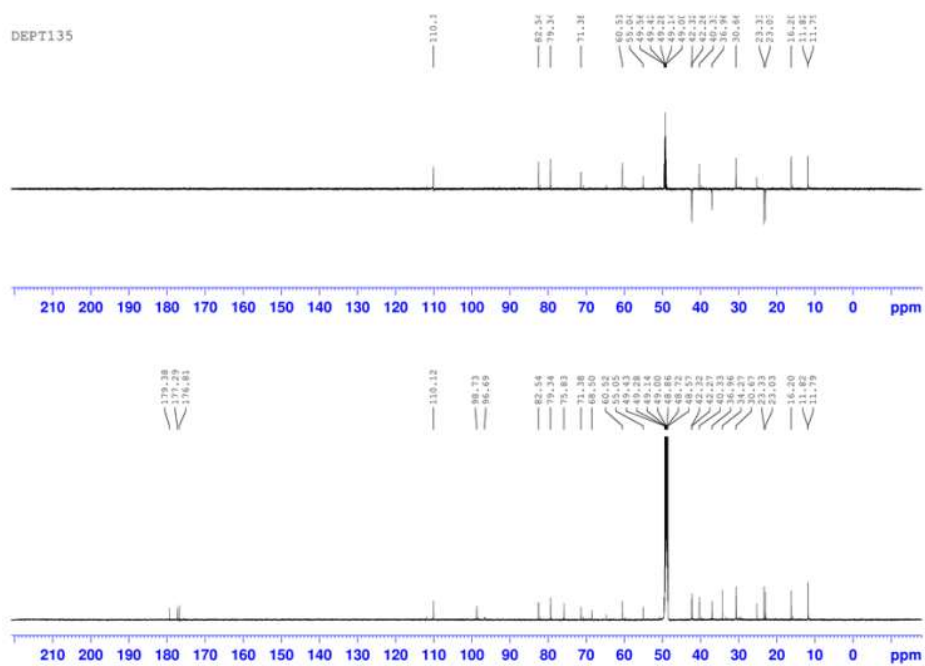

Figure S27 <sup>13</sup>C NMR spectrum of 5

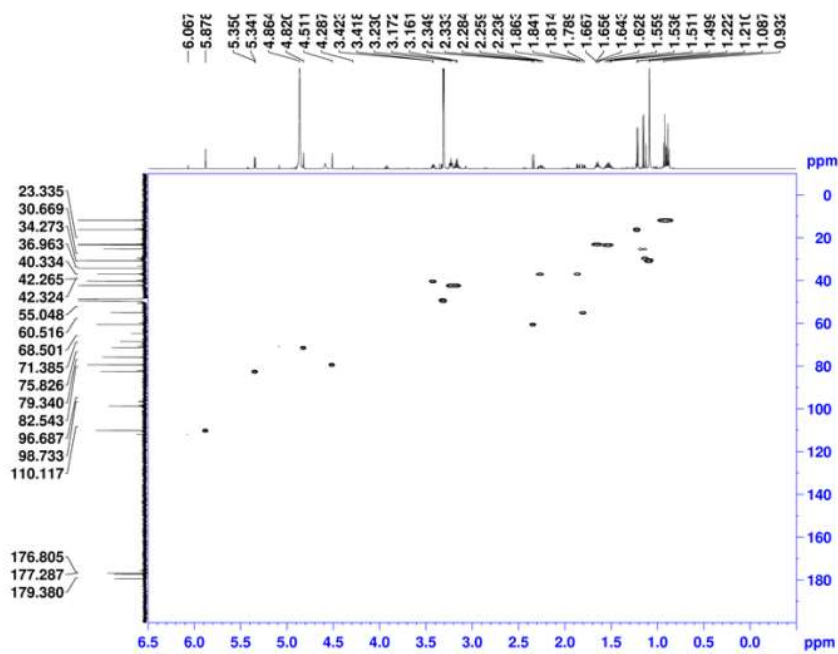

Figure S28 HSQC spectrum of 5

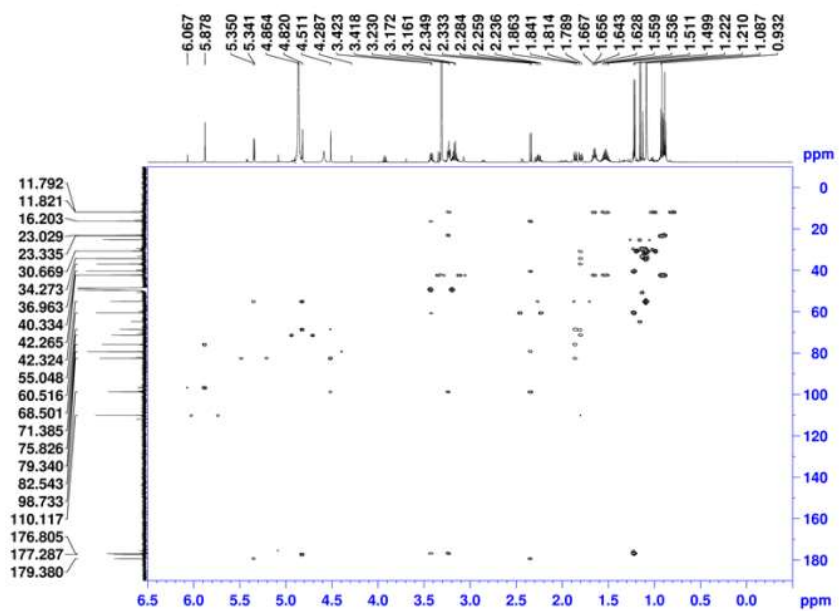

Figure S29 HMBC spectrum of 5

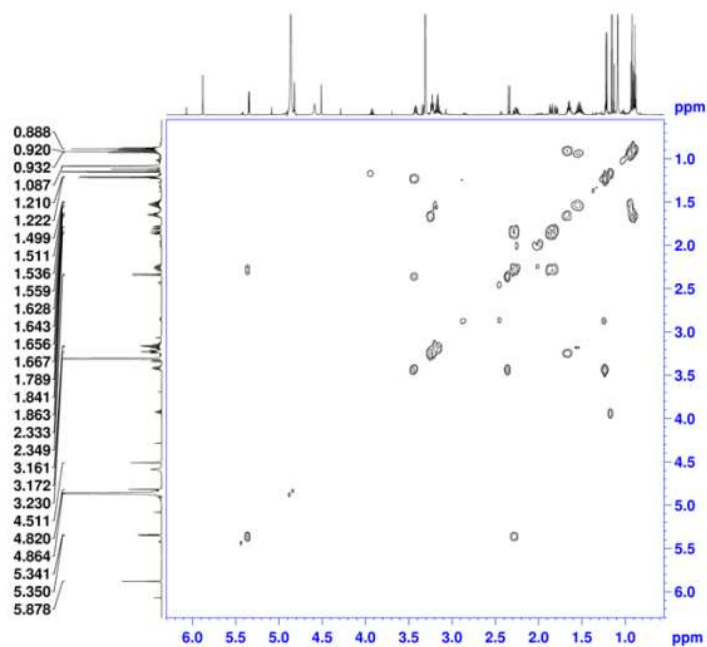

Figure S30  $^1\text{H}$ - $^1\text{H}$  COSY spectrum of 5

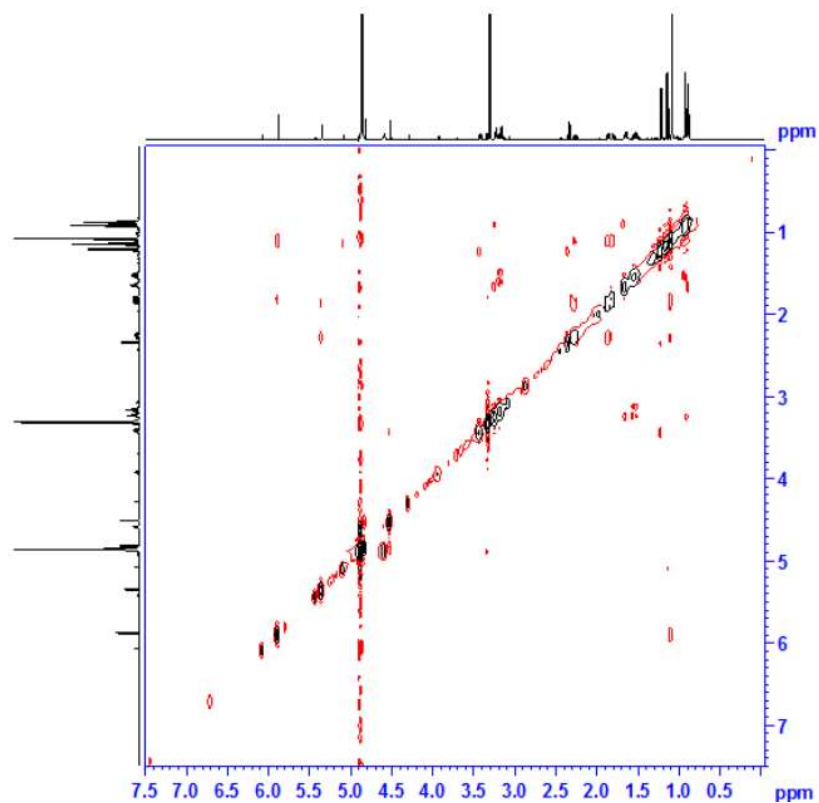

**Figure S31** NOESY spectrum of **5**

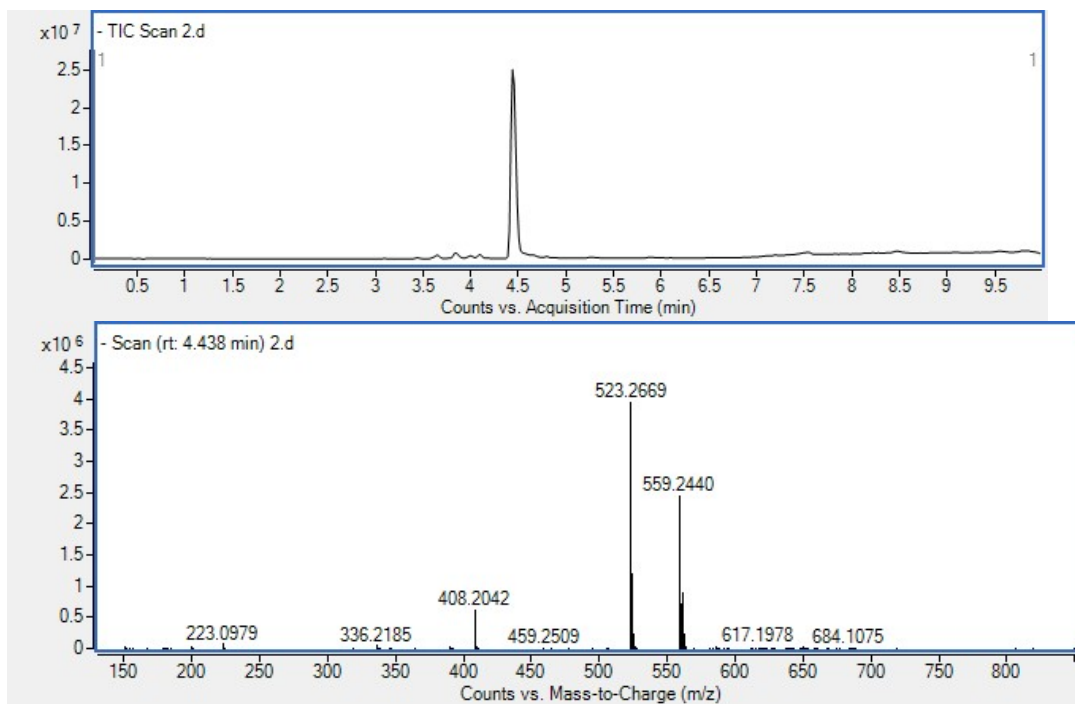

**Figure S32** HR-ESI/TOF-MS spectrum of **5**

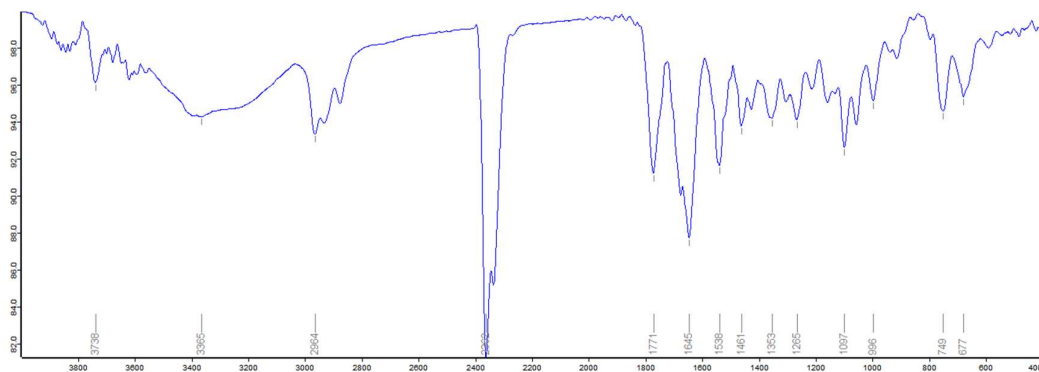

**Figure S33** IR spectrum of **5**

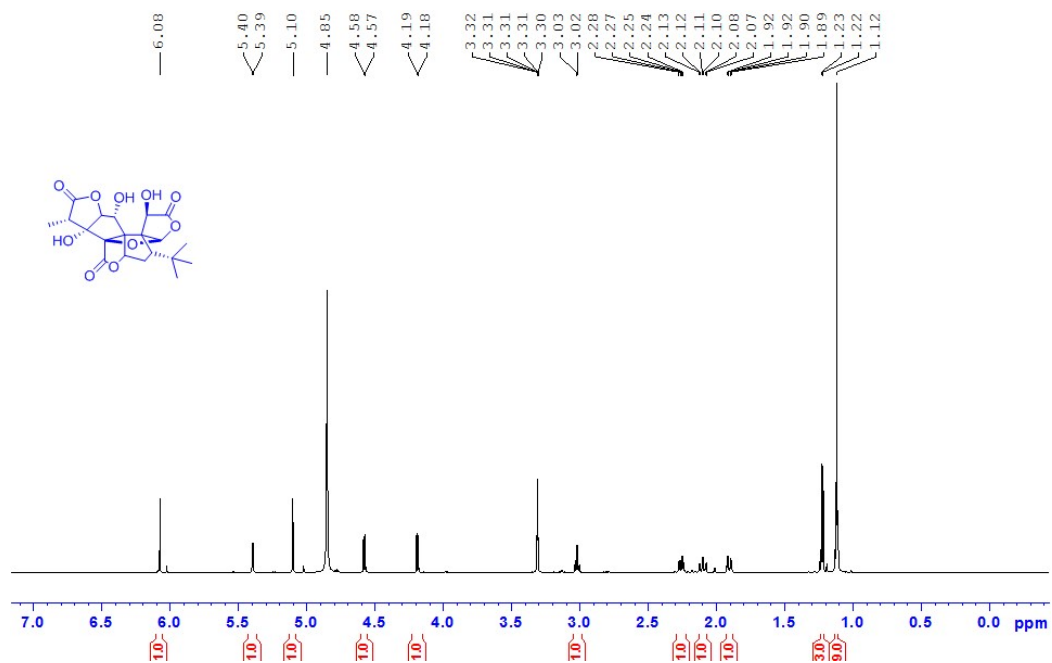

**Figure S34**  $^1\text{H}$  NMR spectrum of **GB (1)**

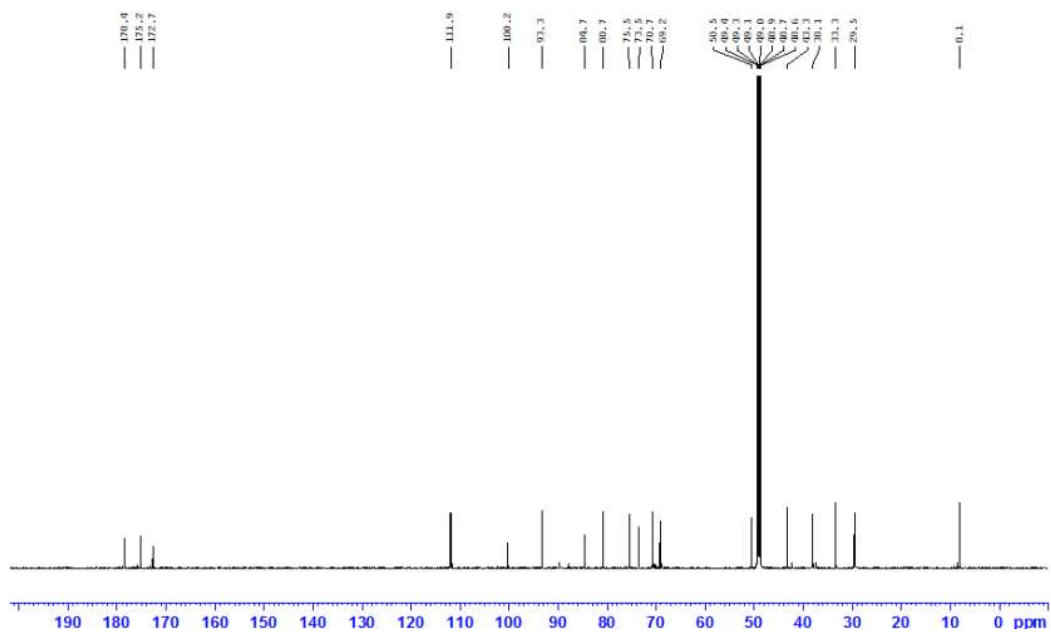

**Figure S35**  $^{13}\text{C}$  NMR spectrum of **GB (1)**

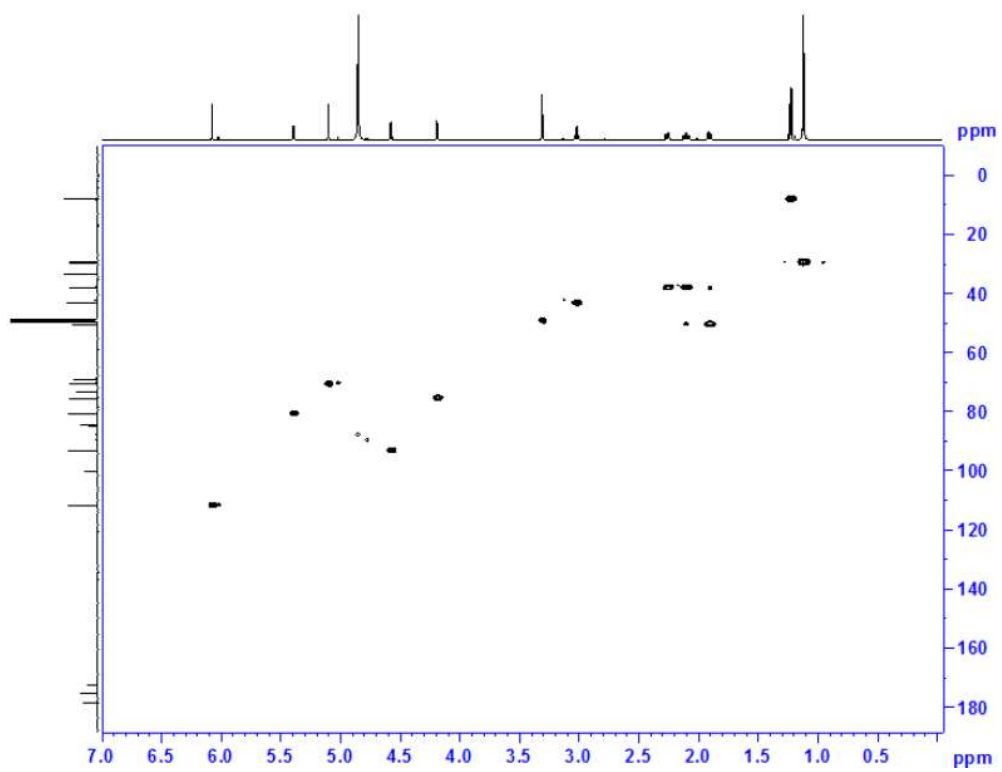

**Figure S36** HSQC spectrum of **GB (1)**

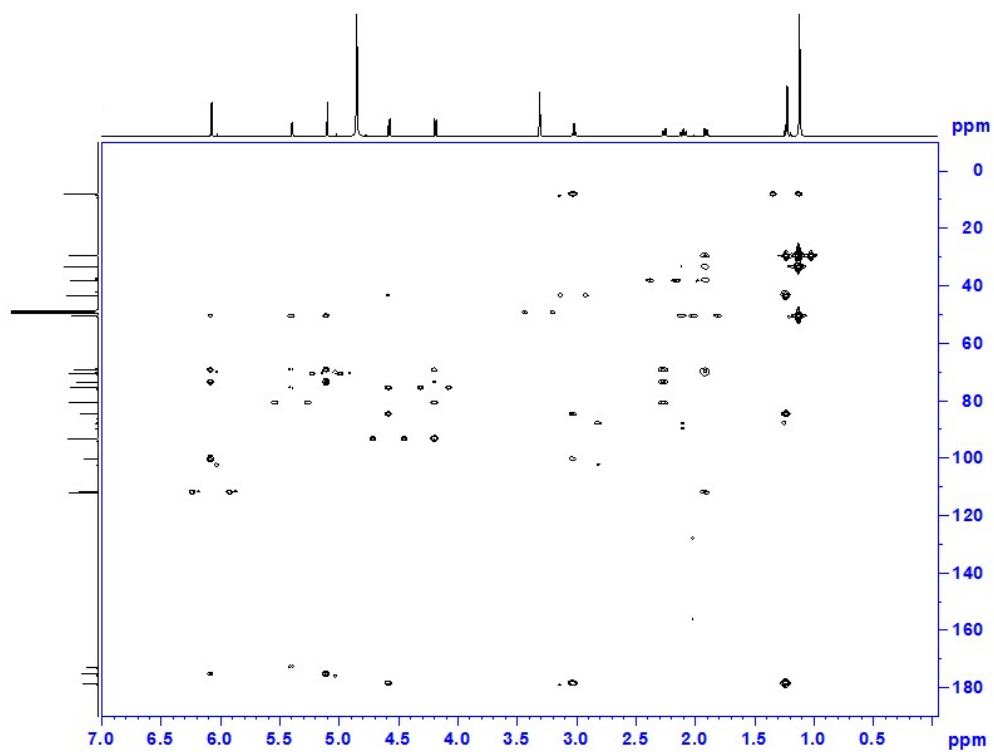

**Figure S37** HMBC spectrum of **GB (1)**
